# Supplementary material for: Prevalence of Polymorphism and Post-Training Expression of ACTN3 (R/X) and ACE (I/D) Genes in CrossFit Athletes
Source: MDPI journal article supplement (doi:10.3390/ijerph20054404), 2023-03-01
Supplement: s1 [file s1]

En las tablas S se muestran las correlaciones entre las mismas capacidades físicas previas y posteriores al entrenamiento diferenciadas por genotipo.

En la tabla S1. se muestran las correlaciones con el genotipo ACTN3 RR en donde el aumento de la fuerza de los músculos flexores del brazo derecho está directamente relacionado con el aumento de la mayoría de las capacidades físicas evaluadas, donde podemos ver que la potencia de pesos medios y altos estuvieron principalmente relacionadas con la mayoría de las capacidades físicas evaluadas.

**Tabla S1.**

*Correlaciones entre las mismas capacidades físicas por genotipo ACTN3 RR*

| Variable           | Dinamo der (N) | Dinamo izq (N) | RM Front SQ (lb) | RM Shoulder P (lb) | PPower35 (kg) | PPower55 (kg) | PPower75 (kg) | PSplitj35 (kg) | PSplitj55 (kg) | PSplitj75 (kg) |
|--------------------|----------------|----------------|------------------|--------------------|---------------|---------------|---------------|----------------|----------------|----------------|
| Dinamo der (N)     |                | 0.969          | 0.992            |                    | 0.970         | 0.966         | 0.978         | 0.972          | 0.998          | 0.995          |
| Dinamo izq (N)     | 0.969          |                |                  | 0.980              |               |               |               |                | 0.954          | 0.951          |
| RM Front SQ (lb)   | 0.992          |                |                  |                    | 0.981         | 0.974         | 0.973         | 0.978          | 0.998          | 0.999          |
| RM Shoulder P (lb) |                | 0.980          |                  |                    |               |               |               |                |                |                |
| PPower35 (kg)      | 0.970          |                | 0.981            |                    |               | 0.999         | 0.992         | 0.999          | 0.981          | 0.980          |
| PPower55 (kg)      | 0.966          |                | 0.974            |                    | 0.999         |               | 0.995         | 1.000          | 0.977          | 0.974          |

|                |       |       |       |       |       |       |       |       |       |
|----------------|-------|-------|-------|-------|-------|-------|-------|-------|-------|
| PPower75 (kg)  | 0.978 |       | 0.973 | 0.992 | 0.995 |       | 0.996 | 0.982 | 0.976 |
| PSplitj35 (kg) | 0.972 |       | 0.978 | 0.999 | 1.000 | 0.996 |       | 0.981 | 0.978 |
| PSplitj55 (kg) | 0.998 | 0.954 | 0.998 | 0.981 | 0.977 | 0.982 | 0.981 |       | 0.999 |
| PSplitj75 (kg) | 0.995 | 0.951 | 0.999 | 0.980 | 0.974 | 0.976 | 0.978 | 0.999 |       |

*Dinamo der= Dinamometría derecha; Dinamo izq= Dinamometría izquierda; ClasDinamo der= Clasificación dinamometría derecha; ClasDinamo izq= Clasificación dinamometría izquierda; RM Front SQ= Repetición máxima de front squat; RM Shoulder P= Repetición máxima de shoulder press; VO2max= Consumo máximo de oxígeno; ClasVO2max= Clasificación de consumo máximo de oxígeno; PPower35= Potencia en power clean a 35%; PPower55= Potencia en power clean a 55%; PPower75= Potencia en power clean a 75%; PSplit35= Potencia en Split jerk a 35%; PSplit55= Potencia en Split jerk a 55%; PSplit75= Potencia en Split jerk a 75%.*

En la tabla S2. se muestran las correlaciones con el genotipo ACTN3 RX en donde el aumento de la fuerza máxima de Front Squat está principalmente relacionado con el aumento de la mayoría de las capacidades físicas evaluadas, de la misma manera, la potencia con pesos altos estuvo principalmente relacionada con la mayoría de las capacidades físicas evaluadas. Entre los diferentes genotipos evaluados, fue el único que relaciono el aumento de la fuerza máxima de Front Squat con el consumo máximo de oxígeno.

**Tabla S2.**

*Correlaciones entre las mismas capacidades físicas por genotipo ACTN3 RX*

| Variable       | Dinamo der (N) | Dinamo izq (N) | RM Front SQ (lb) | RM Shoulder P (lb) | VO <sup>2</sup> max (ml/kg/min) | PPower35 (kg) | PPower55 (kg) | PPower75 (kg) | PSplitj35 (kg) | PSplitj55 (kg) | PSplitj75 (kg) |
|----------------|----------------|----------------|------------------|--------------------|---------------------------------|---------------|---------------|---------------|----------------|----------------|----------------|
| Dinamo der (N) |                | 0.962          | 0.875            | 0.925              |                                 | 0.742         | 0.747         | 0.715         |                |                | 0.898          |

|                                    |       |       |       |       |       |       |       |       |       |       |       |
|------------------------------------|-------|-------|-------|-------|-------|-------|-------|-------|-------|-------|-------|
| Dinamo izq<br>(N)                  | 0.962 |       | 0.800 | 0.947 |       | 0.790 | 0.708 |       |       |       | 0.901 |
| RM Front<br>SQ (lb)                | 0.875 | 0.800 |       | 0.875 | 0.767 | 0.737 | 0.801 | 0.783 |       |       | 0.717 |
| RM<br>Shoulder P<br>(lb)           | 0.925 | 0.947 | 0.875 |       |       | 0.711 |       |       |       |       | 0.761 |
| VO <sup>2</sup> max<br>(ml/kg/min) |       |       | 0.767 |       |       |       |       |       |       |       |       |
| PPower35<br>(kg)                   | 0.742 | 0.790 | 0.737 | 0.711 |       |       | 0.909 | 0.699 |       |       | 0.818 |
| PPower55<br>(kg)                   | 0.747 | 0.708 | 0.801 |       |       | 0.909 |       | 0.901 | 0.680 |       |       |
| PPower75<br>(kg)                   | 0.715 |       | 0.783 |       |       | 0.699 | 0.901 |       |       | 0.822 | 0.809 |
| PSplitj35<br>(kg)                  |       |       |       |       |       |       | 0.680 |       |       | 0.898 |       |
| PSplitj55<br>(kg)                  |       |       |       |       |       |       | 0.822 | 0.686 | 0.898 |       |       |
| PSplitj75<br>(kg)                  | 0.898 | 0.901 | 0.717 | 0.761 |       | 0.818 | 0.853 | 0.809 |       |       |       |

*Dinamo der= Dinamometría derecha; Dinamo izq= Dinamometría izquierda; ClasDinamo der= Clasificación dinamometría derecha; ClasDinamo izq= Clasificación dinamometría izquierda; RM Front SQ= Repetición máxima de front squat; RM Shoulder P= Repetición máxima de shoulder press; VO2max= Consumo máximo de oxígeno; ClasVO2max= Clasificación de consumo máximo de oxígeno; PPower35= Potencia en power clean a 35%; PPower55= Potencia en power clean a 55%; PPower75= Potencia en power clean a 75%; PSplit35= Potencia en Split jerk a 35%; PSplit55= Potencia en Split jerk a 55%; PSplit75= Potencia en Split jerk a 75%.*

En la tabla S3. se muestran las correlaciones con el genotipo ACTN3 XX en donde el aumento de la fuerza máxima de Shoulder Press está principalmente relacionado con el aumento de la mayoría de las capacidades físicas evaluadas, así mismo, la potencia con pesos bajos estuvo directamente relacionada con la mayoría de las capacidades físicas evaluadas.

**Tabla S3.**

*Correlaciones entre las mismas capacidades físicas por genotipo ACTN3 XX*

| Variable                        | Dinamo der (N) | Dinamo izq (N) | RM Front SQ (lb) | RM Shoulder P (lb) | VO <sup>2</sup> max (ml/kg/min) | PPower35 (kg) | PPower55 (kg) | PPower75 (kg) | PSplitj35 (kg) | PSplitj55 (kg) | PSplitj75 (kg) |
|---------------------------------|----------------|----------------|------------------|--------------------|---------------------------------|---------------|---------------|---------------|----------------|----------------|----------------|
| Dinamo der (N)                  |                | 0.937          |                  | 0.914              |                                 | 0.885         | 0.879         |               |                |                |                |
| Dinamo izq (N)                  | 0.937          |                | 0.917            | 0.935              |                                 | 0.932         | 0.931         |               |                | 0.915          |                |
| RM Front SQ (lb)                |                | 0.917          |                  | 0.961              |                                 | 0.939         |               |               | 0.986          | 0.998          | 0.989          |
| RM Shoulder P (lb)              | 0.914          | 0.935          | 0.961            |                    |                                 | 0.950         | 0.881         |               | 0.958          | 0.964          | 0.955          |
| VO <sup>2</sup> max (ml/kg/min) |                |                |                  |                    |                                 |               |               |               |                |                |                |
| PPower35 (kg)                   | 0.885          | 0.932          | 0.939            | 0.950              |                                 |               | 0.978         | 0.979         | 0.933          | 0.958          | 0.951          |
| PPower55 (kg)                   | 0.879          | 0.931          |                  | 0.881              |                                 | 0.978         |               | 0.987         |                | 0.895          | 0.951          |
| PPower75 (kg)                   |                |                |                  |                    |                                 | 0.979         | 0.987         |               | 0.902          | 0.902          | 0.898          |
| PSplitj35 (kg)                  |                | 0.915          | 0.998            | 0.964              |                                 | 0.958         | 0.895         | 0.902         | 0.990          |                | 0.955          |
| PSplitj55 (kg)                  |                |                | 0.986            | 0.958              |                                 | 0.933         |               |               |                | 0.990          | 0.997          |



|                   |       |       |       |  |  |       |       |       |       |       |       |
|-------------------|-------|-------|-------|--|--|-------|-------|-------|-------|-------|-------|
| PPower35<br>(kg)  | 0.975 | 0.955 | 0.987 |  |  | 0.959 |       | 0.990 | 0.970 |       |       |
| PPower55<br>(kg)  |       |       |       |  |  | 0.959 |       | 0.999 | 0.957 | 0.962 | 0.969 |
| PPower75<br>(kg)  |       |       |       |  |  |       | 0.999 |       |       | 0.953 | 0.962 |
| PSplitj35<br>(kg) | 0.992 | 0.955 | 0.983 |  |  | 0.990 | 0.957 |       |       | 0.993 | 0.984 |
| PSplitj55<br>(kg) | 0.982 |       | 0.955 |  |  | 0.970 | 0.962 | 0.953 | 0.993 |       | 0.998 |
| PSplitj75<br>(kg) | 0.967 |       |       |  |  | 0.958 | 0.969 | 0.962 | 0.984 | 0.998 |       |

---

*Dinamo der= Dinamometría derecha; Dinamo izq= Dinamometría izquierda; ClasDinamo der= Clasificación dinamometría derecha; ClasDinamo izq= Clasificación dinamometría izquierda; RM Front SQ= Repetición máxima de front squat; RM Shoulder P= Repetición máxima de shoulder press; VO2max= Consumo máximo de oxígeno; ClasVO2max= Clasificación de consumo máximo de oxígeno; PPower35= Potencia en power clean a 35%; PPower55= Potencia en power clean a 55%; PPower75= Potencia en power clean a 75%; PSplit35= Potencia en Split jerk a 35%; PSplit55= Potencia en Split jerk a 55%; PSplit75= Potencia en Split jerk a 75%.*

En la tabla S5. se muestran las correlaciones con el genotipo ACE ID en donde el aumento de la fuerza máxima de Front Squat está directamente relacionado con el aumento de la mayoría de las capacidades físicas evaluadas, de la misma manera la potencia con pesos bajos, la cual estuvo directamente relacionada con la mayoría de las capacidades físicas evaluadas.

**Tabla S5.**

*Correlaciones entre las mismas capacidades físicas por genotipo ACE ID*

| Variable                        | Dinamo der (N) | Dinamo izq (N) | RM Front SQ (lb) | RM Shoulder P (lb) | VO <sup>2</sup> max (ml/kg/min) | PPower35 (kg) | PPower55 (kg) | PPower75 (kg) | PSplitj35 (kg) | PSplitj55 (kg) | PSplitj75 (kg) |
|---------------------------------|----------------|----------------|------------------|--------------------|---------------------------------|---------------|---------------|---------------|----------------|----------------|----------------|
| Dinamo der (N)                  |                | 0.942          | 0.804            | 0.922              |                                 | 0.609         |               | 0.662         |                |                | 0.842          |
| Dinamo izq (N)                  | 0.942          |                | 0.811            | 0.934              |                                 | 0.657         |               |               |                |                | 0.904          |
| RM Front SQ (lb)                | 0.804          | 0.811          |                  | 0.885              |                                 | 0.761         | 0.751         | 0.797         | 0.756          | 0.826          | 0.839          |
| RM Shoulder P (lb)              | 0.922          | 0.934          | 0.885            |                    |                                 |               |               | 0.681         |                |                | 0.854          |
| VO <sup>2</sup> max (ml/kg/min) |                |                |                  |                    |                                 |               |               |               |                |                |                |
| PPower35 (kg)                   | 0.609          | 0.657          | 0.761            |                    |                                 |               | 0.910         | 0.690         | 0.825          | 0.809          | 0.686          |
| PPower55 (kg)                   |                |                | 0.751            |                    |                                 | 0.910         |               | 0.836         | 0.766          | 0.730          |                |
| PPower75 (kg)                   | 0.662          |                | 0.797            | 0.681              |                                 | 0.690         | 0.836         |               |                |                |                |
| PSplitj35 (kg)                  |                |                | 0.756            |                    |                                 | 0.825         | 0.766         |               |                | 0.964          |                |
| PSplitj55 (kg)                  |                |                | 0.826            |                    |                                 | 0.809         | 0.730         |               | 0.964          |                | 0.644          |

|                   |       |       |       |       |       |       |
|-------------------|-------|-------|-------|-------|-------|-------|
| PSplitj75<br>(kg) | 0.842 | 0.904 | 0.839 | 0.854 | 0.686 | 0.644 |
|-------------------|-------|-------|-------|-------|-------|-------|

*Dinamo der= Dinamometría derecha; Dinamo izq= Dinamometría izquierda; ClasDinamo der= Clasificación dinamometría derecha; ClasDinamo izq= Clasificación dinamometría izquierda; RM Front SQ= Repetición máxima de front squat; RM Shoulder P= Repetición máxima de shoulder press; VO2max= Consumo máximo de oxígeno; ClasVO2max= Clasificación de consumo máximo de oxígeno; PPower35= Potencia en power clean a 35%; PPower55= Potencia en power clean a 55%; PPower75= Potencia en power clean a 75%; PSplit35= Potencia en Split jerk a 35%; PSplit55= Potencia en Split jerk a 55%; PSplit75= Potencia en Split jerk a 75%.*

En la tabla S6. se muestran las correlaciones con el genotipo ACE II en donde relaciono únicamente el aumento de la fuerza máxima de los músculos flexores del brazo izquierdo con el aumento en la potencia con pesos bajos. Por otra parte, el aumento en la fuerza máxima de Shoulder Press disminuyo la potencia con pesos medios. El aumento en la potencia con pesos medios disminuye la potencia con pesos altos.

**Tabla S6.**

*Correlaciones entre las mismas capacidades físicas por genotipo ACE II*

| Variable           | Dinamo der (N) | Dinamo izq (N) | RM Front SQ (lb) | RM Shoulder P (lb) | VO <sup>2</sup> max (ml/kg/min) | PPower35 (kg) | PPower55 (kg) | PPower75 (kg) | PSplitj35 (kg) | PSplitj55 (kg) | PSplitj75 (kg) |
|--------------------|----------------|----------------|------------------|--------------------|---------------------------------|---------------|---------------|---------------|----------------|----------------|----------------|
| Dinamo der (N)     |                |                |                  |                    |                                 |               |               |               |                |                |                |
| Dinamo izq (N)     |                |                |                  |                    | 0.998                           |               |               |               |                |                |                |
| RM Front SQ (lb)   |                |                |                  |                    |                                 |               |               |               |                |                |                |
| RM Shoulder P (lb) |                |                |                  |                    |                                 |               | -0.997        |               |                |                |                |

VO<sup>2</sup>max  
(ml/kg/min)

PPower35  
(kg)

0.998

PPower55  
(kg)

-0.997

-1.000

PPower75  
(kg)

-1.000

PSplitj35  
(kg)

PSplitj55  
(kg)

PSplitj75  
(kg)

---

*Dinamo der= Dinamometría derecha; Dinamo izq= Dinamometría izquierda; ClasDinamo der= Clasificación dinamometría derecha; ClasDinamo izq= Clasificación dinamometría izquierda; RM Front SQ= Repetición máxima de front squat; RM Shoulder P= Repetición máxima de shoulder press; VO2max= Consumo máximo de oxígeno; ClasVO2max= Clasificación de consumo máximo de oxígeno; PPower35= Potencia en power clean a 35%; PPower55= Potencia en power clean a 55%; PPower75= Potencia en power clean a 75%; PSplit35= Potencia en Split jerk a 35%; PSplit55= Potencia en Split jerk a 55%; PSplit75= Potencia en Split jerk a 75%.*
